# Supplementary material
Source: Springer Nature journal article supplement (https://www.springerprofessional.de/resource/supplementary/13638_2012_544_MOESM20_ESM.pdf/11898030)

BPSK BER  $F_s=2e6$   $F_b=200e3$ 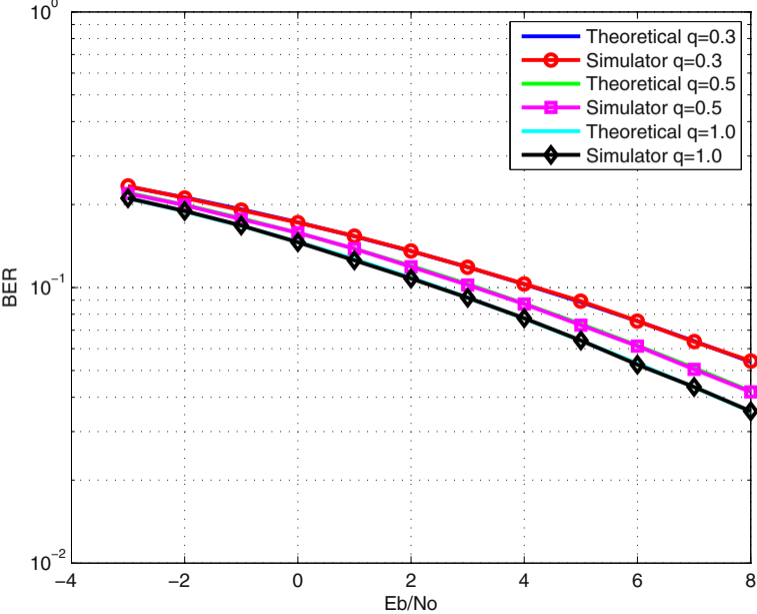

Supplement: MOESM20 [file 11898030]
